# Supplementary material for: Phase transformation of ultrathin nanowires through lanthanide doping: from InOOH to rh-In2O3
Source: Royal Society of Chemistry journal article supplement (doi:10.1039/c3dt32929a), 2013-01-01
Supplement: c3dt32929a.pdf [file c3dt32929a.pdf]

## *Electronic Supplementary Information*

### **Phase transformation of ultrathin nanowires through lanthanide doping: from InOOH to rh-In<sub>2</sub>O<sub>3</sub>**

Wen-Hui Zhang,<sup>a</sup> Feng Wang,<sup>b</sup> and Wei-De Zhang<sup>\*,a</sup>

<sup>a</sup> School of Chemistry and Chemical Engineering, South China University of Technology, 381 Wushan Road, Guangzhou 510640, China

<sup>b</sup> Department of Physics and Materials Science, City University of Hong Kong, 83 Tat Chee Avenue, Hong Kong SAR, China.

#### **Experimental details**

**Materials.** Indium(III) chloride tetrahydrate (InCl<sub>3</sub>·4H<sub>2</sub>O), gadolinium(III) chloride hydrate (GdCl<sub>3</sub>·xH<sub>2</sub>O), indium(III) acetylacetonate (In(acac)<sub>3</sub>), gadolinium(III) acetylacetonate (Gd(acac)<sub>3</sub>), oleylamine (OM, 70%) were purchased from Sigma-Aldrich and used as starting materials without further purification.

**Synthesis of nanocrystals.** The InOOH precursors were prepared by a solvothermal route firstly reported by Xu and Wang.<sup>1</sup> In a typical procedure, 0.1 g InCl<sub>3</sub>·4H<sub>2</sub>O and 0 g or 0.0065 g GdCl<sub>3</sub>·xH<sub>2</sub>O ( $n_{\text{Gd}}/n_{\text{In+Gd}}=5\%$ ) was dissolved in 5 mL of OM. Then, 8 mL of ethanol was dropped in while ultrasonicing, forming a clear solution, which was transferred into a Teflon-lined stainless steel autoclave to react at 180 °C for 12 h. The product was collected at the bottom, washed three times with ethanol, and centrifuged at 5000 rpm for 2 min. The white product can be well redispersed in cyclohexane.

When the chlorides were replaced by acetylacetonates as raw materials, 0.1405 g In(acac)<sub>3</sub> and 0 g or 0.0082 g Gd(acac)<sub>3</sub> ( $n_{\text{Gd}}/n_{\text{In+Gd}}=5\%$ ) were used and other procedures were the same as described above. The Gd-doped product can be well redispersed in cyclohexane.

To transform  $\text{InOOH}$  to  $\text{In}_2\text{O}_3$ , the as-synthesized  $\text{InOOH}$  precursors redispersed in 1 ml cyclohexane was heated in 10 ml OM at 100 °C for 30 min, then degased at 100 °C for 30 min and subsequently heated at 250 or 300 °C for 30 min under Ar atmosphere. The product was washed three times with ethanol and collected by centrifugation at 5000 rpm for 2 min.

**Characterization.** JEM 1400 transmission electron microscope (TEM) operated at 120 kV was used to record TEM images of the samples. Scanning transmission electron microscopy (STEM) and high-resolution TEM (HRTEM) images were taken with FEI Tecnai F20 with an attached energy dispersed X-ray spectrometer (EDS). Powder X-ray diffraction (XRD) analyses were performed on a Philips PW-1830 X-ray diffractometer with  $\text{Cu K}\alpha$  irradiation ( $\lambda = 1.5406 \text{ \AA}$ ) at a scanning speed of 0.014 degree/sec over the  $2\theta$  range of 10–70 degree. The photoluminescence (PL) spectroscopic measurements were performed on a LabRam HR spectrometer (JY-Horiba) with He-Cd laser as the excitation source ( $\lambda_{\text{ex}} = 325 \text{ nm}$ ).

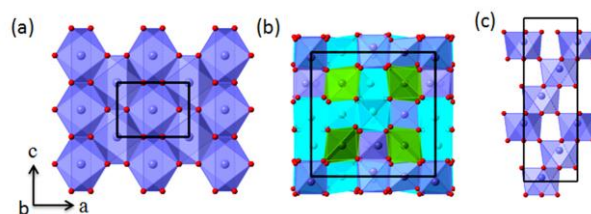

**Figure S1** Crystal unit cell of (a)  $\text{InOOH}$  (H is not included for clarification), (b)  $c\text{-In}_2\text{O}_3$  and (c)  $\text{rh-In}_2\text{O}_3$  viewed along the b axes.

## Reference

- 1 X. X. Xu and X. Wang, *Inorg. Chem.*, 2009, **48**, 3890.
